# Supplementary material for: Automated Medication Dispensing System: Are We Meeting Patient Needs? Insights from People Living with HIV’s Perspectives in Eswatini
Source: Research Square preprint supplement (doi:10.21203/rs.3.rs-8145607/v1), 2025-12-22
Supplement: Supplementary file 1 [file 14f5a726361f7159402d19cf.docx]

# Patient Interview Guide and Questions

This interview guide provides an outline of questions the patient should be asked based on the different sections of the patient questionnaire. The questions should be adapted to the scenario and context and may not necessarily be asked as outlined in the questionnaire. The interviewer/researcher should also observe and utilize cues presented by the patient during the interview. The interview will be done through a phone call but where a patient indicates a preference for an in-person interview, this will be arranged.

The interview aims to obtain vital information from patients on their experiences and level of satisfaction with the use of the automated medication dispensing machine to access their medication instead of routine care. The interview will also seek recommendations from patients on how best the machine can be implemented to serve them better and enhance access to medications.

## Section A: Introduction

The first part of the interview aims to develop rapport with the patient you are interviewing. It is important to develop a non-judgemental tone throughout the interview and to convey that there are no right or wrong answers.

First, ensure the patient is comfortable and at ease. Then take the following steps:

- Introduce yourself and confirm you have the right patient for the interview by saying their name and surname and asking them to confirm if they are the one.
- Develop rapport with the patient you are interviewing.
- Ensure the patient is comfortable and at ease
- Provide a recap of the study information for the patient.
- Remind the patient that after using the AMDS, they provided consent to participate in the interview and only those who ticked a yes were listed for the interview.
- The study information sheet was also placed by the system for the patients.
- Obtain verbal consent again from the patient to proceed with the interview.
- Also, obtain the patient's consent to record the interview.
- Use a non-judgemental tone throughout the interview to convey that there are no right or wrong answers.
- Assure the patient that everything they say during the interview will be confidential and their names will not be linked to any comments in the final study report.

***Example introduction – adapt as appropriate***

- “Hello Mr XYZ, thank you for agreeing to be interviewed for our study today.
- As explained earlier, we are conducting a study to assess the usefulness of the automated medication dispensing machine for dispensing medications to all patients
- We would like to know your views on this machine.
- We are interviewing you to better understand your experiences, perceptions, and level of satisfaction with the use of the machine to access your medication instead of using the dispensary
- and to also get your recommendation on how to improve the machine”
- We are interested in your opinion today; everything you say is very important.
- I will not talk much, but I want you to talk freely, and as much as you want.
- There are no “good” or “bad” answers.

## Section B: Questions to provide a background on the patient

This part of the interview aims to understand the background of the patient and the processes they undergo to access their medications before they started using the machine.

***Question 1:*** Which health facilities have you been picking your medications from before you started using the machine?

***Question 2:*** If you compare how you used to pick up your medication from the clinic and picking from the machine, which one of them do you like most? (Probe – why?) or Is there anything particular about these facilities that you remember?

## Section C: Patient's Experiences with the machine

This part of the interview aims to understand the experiences of the patient with using the machine.

***Approach***

Now, I would like to ask you some questions about your experiences using the machine to access your medications.

***Question 1:*** How do you feel about getting your medications from a machine instead of a face-to-face encounter with a healthcare worker? (Probe: what do you think about the new machine?)

***Question 2:*** Do you think getting your medications from the machine has affected the care you receive in any way?

***Question 3:*** What do you like most about getting your medication from the machine?

***Question 4:*** What don’t you like about getting your medication from the machine?

***Question 5***: Would you like to continue using the machine? (Probe: Why? / Why not?)

**Question 6**: Would you recommend the use of the machine to someone you know? (Probe: Why?/Why not?)

## Section D: Level of satisfaction with the machine

This section will ask patients questions to identify their level of satisfaction with the machine.

***Question 1:*** Does using this machine solve any problems for you? (Probe: if yes, elaborate on what the problem was and how the machine is helping. If no, ask to know what expectation they had that is not being met by the machine)

**General Satisfaction**

***Question 2***: Are you satisfied or happy with certain things about this machine? (Probe – If “yes” ask them to describe the things they are satisfied with. If “No” go to the next question.)

***Question 3***: Are you dissatisfied with certain things about this machine? ***Question 3***: Are you dissatisfied with certain things about this machine? (Probe – If “yes”, ask them to describe the things they are dissatisfied with)

**Satisfaction with Time**

***Question 4***: Are you satisfied with the time it takes you to get your medication from the machine? (Probe – what do you think compared to getting your medication from healthcare workers?)

**Accessibility and Convenience**

***Question 5***: With this machine, you can get your medication at any time. What do you think about this? (Probe – compared to obtaining from healthcare workers, what do you think?)

***Question 6***: Is it convenient for you to access the machine when picking up your medication? (Probe – compared to obtaining your medication from healthcare workers, what do you think?)

## Section E: Challenges with using the machine

This section will identify challenges the patients encountered while using the machine

***Question 1:*** What difficulties did you encounter while using the machine? (Probe – if difficulties were encountered- how were they resolved? Did you receive any assistance?)

***Question 4:*** If you had an emergency related to your drugs what would you do? (Clients using the machine should have a number they can call in cases of emergencies, but different clients may have other ways of dealing with emergencies)

## Section F: Recommendations on how the machine can be improved

This section will request the patient to provide some recommendations on how the machine can be improved to better meet their needs.

***Question 1:*** From your observations, what do you think we can do to improve the way this machine serves you?

***Question 2:*** Are there other things you would like from this machine that it is not delivering on?

***Question 7:*** Overall, are you happy with using this machine?

***Question 8:*** On a scale of 1 – 10, 1 being the lowest and 10 the highest, rate your satisfaction with the use of this machine to obtain your medication.

## Ending the Interview

Before ending the interview, allow the patient to make any further comments about the topics discussed or to ask questions.

***Thank the participant for his/her time and for sharing experiences and views.***

# **Questions for Interview 2 (Done at least 6 months after Interview 1)**

## Section A: Introduction

First, ensure the patient is comfortable and at ease. Then take the following steps:

- Introduce yourself and confirm you have the right patient for the interview by saying their name and surname and asking them to confirm if they are the one.
- Develop rapport with the patient you are interviewing.
- Ensure the patient is comfortable and at ease
- Provide a recap of the study information for the patient.
- Remind the patient that after using the AMDS, they provided consent to participate in the interview and only those who ticked a yes were listed for the interview.
- The study information sheet was also placed by the system for the patients.
- Obtain verbal consent again from the patient to proceed with the interview.
- Also, obtain the patient's consent to record the interview.
- Use a non-judgemental tone throughout the interview to convey that there are no right or wrong answers.
- Assure the patient that everything they say during the interview will be confidential and their names will not be linked to any comments in the final study report.

***Example introduction – adapt as appropriate***

- “Hello Mr XYZ, thank you for agreeing to be interviewed for our study today.
- As explained earlier, we are conducting a study to assess the usefulness of the automated medication dispensing machine for dispensing medications to all patients
- We would like to know your views on this machine.
- We are interviewing you to better understand your experiences, perceptions, and level of satisfaction with the use of the machine to access your medication instead of using the dispensary
- and to also get your recommendation on how to improve the machine”
- We are interested in your opinion today; everything you say is very important.
- I will not talk much, but I want you to talk freely, and as much as you want.
- There are no “good” or “bad” answers.

## Section B: Patient's Experiences with the machine

This part of the interview aims to understand the experiences of the patient with using the machine.

***Approach***

Now, I would like to ask you some questions about your experiences with the new machine for accessing your medications.

***Question 1:*** How do you feel about getting your medications from a machine instead of a face-to-face encounter with a healthcare worker? (Probe: what do you think about the machine?)

***Question 2:*** Do you think getting your medications from the machine has affected the care you receive in any way?

***Question 3:*** What do you like most about getting your medication from the machine?

***Question 4:*** What don’t you like about getting your medication from the machine?

***Question 5***: Would you like to continue using the machine? (Probe: Why? / Why not?)

**Question 6**: Would you recommend the use of the machine to someone you know? (Probe: Why?/Why not?)

## Section C: Level of satisfaction with the machine

This section will ask patients questions to identify their level of satisfaction with the machine.

**Question 1**: Within the last 6 months, have you visited a health facility to obtain your medications? (Probe - If yes – how many times? What were the reasons for the visit?)

**Question 2**: Are you happy to continue obtaining your medication from the machine? (Probe – if “yes” or “no” ask reasons for the response)

***Question 3***: With what you now know about the machine, what are your overall views about the machine?

**General Satisfaction**

***Question 4:*** Are you satisfied or happy with this machine? (Probe – If “yes” ask they should describe what they are satisfied or happy with about the machine. If “No” go to the next question)

***Question 5:*** Are you dissatisfied with certain things about this machine? (Probe – If “yes”, ask they should describe the things they are dissatisfied with)

**Satisfaction with Time**

***Question 6***: Are you satisfied with the time it takes you to get your medication from the machine? (Probe – what do you think compared to getting your medication from healthcare workers?)

**Accessibility and Convenience**

***Question 7***: With this machine, you can get your medication at any time. What do you think about this? (Probe – compared to obtaining from healthcare workers, what do you think?)

***Question 8***: Is it convenient for you to access the machine when picking up your medication?? (Probe – compared to obtaining your medication from healthcare workers, what do you think?)

## Section F: Recommendations on how the machine can be improved

This section will request the patient to provide some recommendations on how the machine can be improved to better meet their needs.

***Question 1:*** From your observations, what do you think we can do to improve the way this machine serves you?

***Question 2:*** Are there other things you would like from this machine that it is not delivering on?

***Question 3:*** Overall, are you happy with using this machine?

***Question 4:*** On a scale of 1 – 10, 1 being the lowest and 10 the highest, rate your satisfaction with the use of this machine to obtain your medication.

## Ending the Interview

Before ending the interview, allow the patient to make any further comments about the topics discussed or to ask questions.

***Thank the participant for his/her time and for sharing experiences and views.***
